# Supplementary material for: Vertical-cavity surface-emitting laser (VCSEL)-based ultrafast photonic sintering of solid oxide fuel cells (SOFCs): prospects for time-efficient/two-dimensional scalability to large-sized SOFCs
Source: Royal Society of Chemistry journal article supplement (doi:10.1039/d3ta00602f), 2023-01-01
Supplement: d3ta00602f1.pdf [file d3ta00602f1.pdf]

**Vertical-Cavity Surface-Emitting Laser (VCSEL)-Based Ultrafast Photonic Sintering of  
Solid Oxide Fuel Cells (SOFCs): Prospects for Time-Efficient/Two-Dimensional  
Scalability to Large-Sized SOFCs**

*Jaehwan Kim,<sup>a1</sup>, Saeed Ur Rehman,<sup>b1</sup> Myeong-Ill Lee,<sup>c1</sup> Amjad Hussain,<sup>b</sup> Youngsu Noh,<sup>c</sup>  
Jiwon Oh,<sup>a</sup> Wonseck Ku,<sup>a</sup> Na-Eui Kwak,<sup>a</sup> Dohyoung Kim,<sup>a</sup> Heesu Hwang,<sup>a</sup>  
Hee-Sung Yoon<sup>d</sup>, Seungho Park <sup>\*c</sup>, Seung-Bok Lee<sup>\*b,e</sup>, and Jin-Ha Hwang<sup>\*a,c</sup>*

<sup>a</sup>Department of Materials Science and Engineering, Hongik University, Seoul 04066, South Korea

<sup>b</sup>High Temperature Energy Conversion Laboratory, Korea Institute of Energy Research, Daejeon 34129, South Korea

<sup>c</sup>Department of Mechanical Engineering, Hongik University, Seoul 04066, South Korea  
<sup>d</sup>HtoEn Co., Ltd., Pohang 37778, South Korea

<sup>e</sup>Department of Advanced Energy and System Engineering, University of Science and Technology, Daejeon 34113, South Korea

<sup>1</sup>These authors contributed equally to this work.

\*Corresponding Authors: Seungho Park, Seung-Bok Lee and Jin-Ha Hwang

\*Seungho Park

Tel: 82-2-320-1632

Email: spark@hongik.ac.kr

\*Seung-Bok Lee

Tel: 82-42-860-3466

Email: sblee@kier.re.kr

\*Jin-Ha Hwang

Tel: 82-2-320-3069

Email: jhwang@hongik.ac.kr

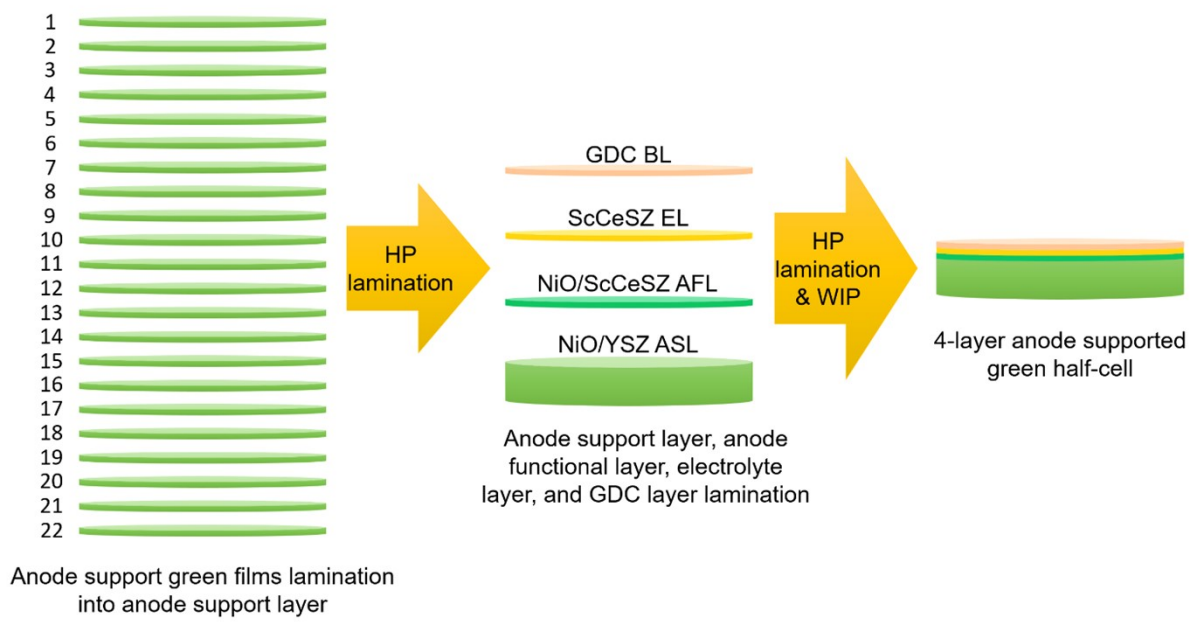

**Supplementary Figure S1.** A schematic showing the fabrication of 4-layer anode-supported green half-cell by hot press lamination and warm isostatic pressing.

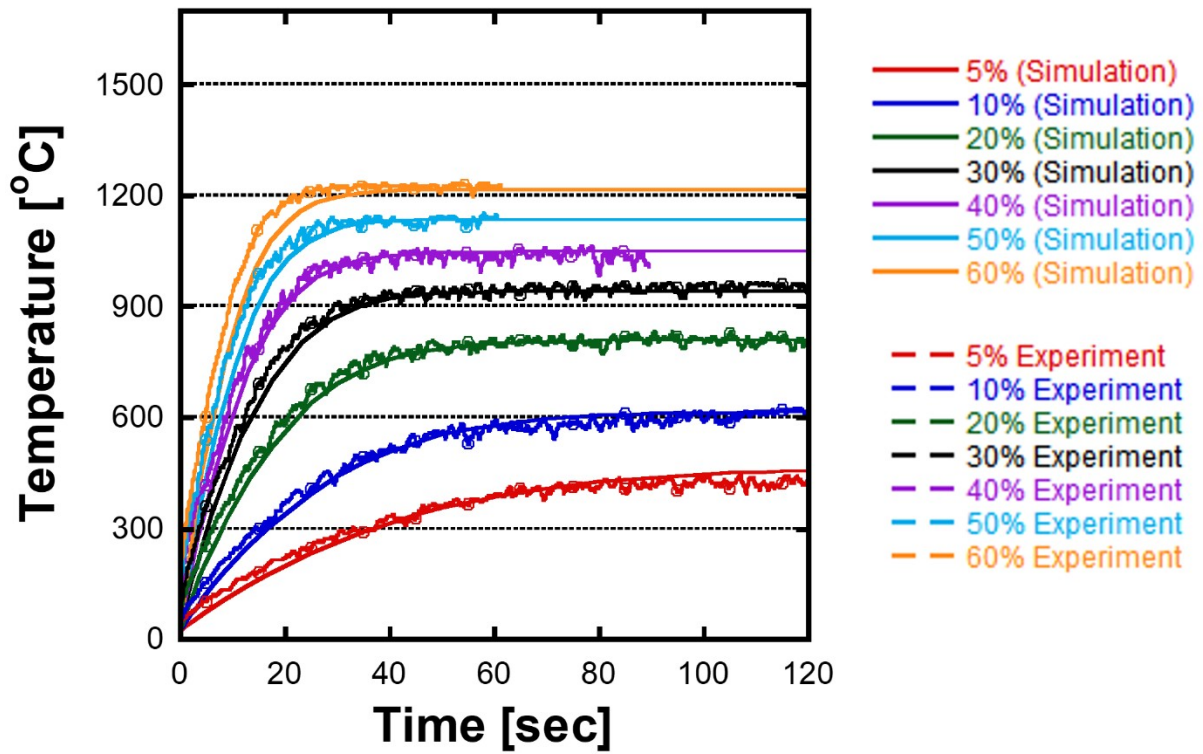

**Supplementary Figure S2.** (a) Thermal profile prediction incorporating exposure of the SiC susceptors to VCSEL illumination and comparison with the empirical temperature measurement as a function of the VCSEL laser power.

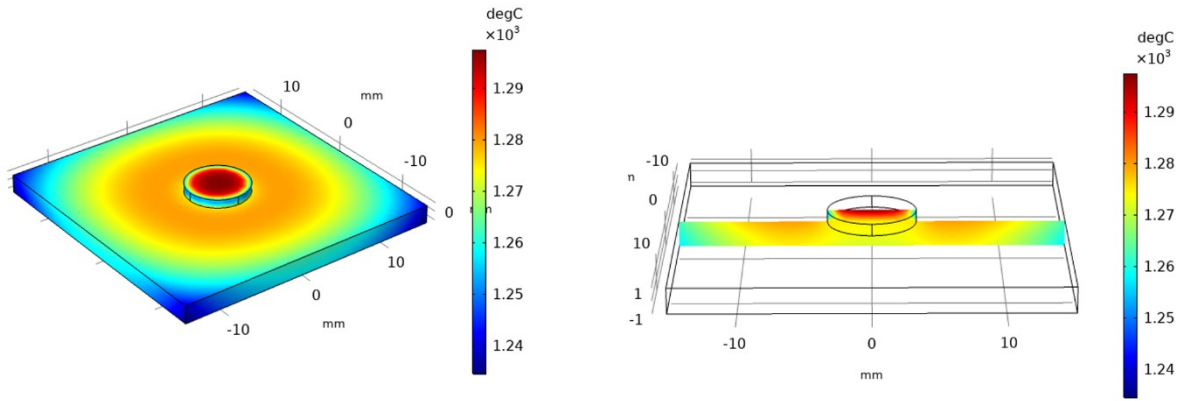

(a)

(b)

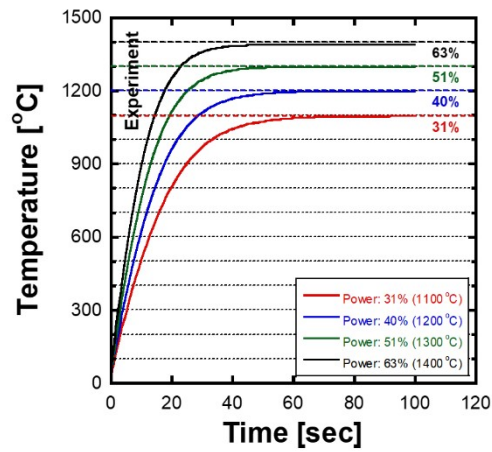

(c)

**Supplementary Figure S3.** Thermal profile calculation incorporating NiO with SiC susceptors subjected to VCSEL-based IR laser illumination. (SiC dimensions: 30 mm x 30 mm x 2 mm; NiO dimensions: 6.9 mm diameter and 0.93 mm thickness.) Simulated temperature profile of NiO positioned onto a SiC susceptor: (a) overall view and cross-sectional view. (c) Thermal profile prediction as a function of VCSEL laser power. (Dashed lines indicate the empirical temperatures obtained by applying the corresponding laser powers (31, 40, 51, & 63%) for targeted temperatures (1100, 1200, 1300, & 1400 °C).

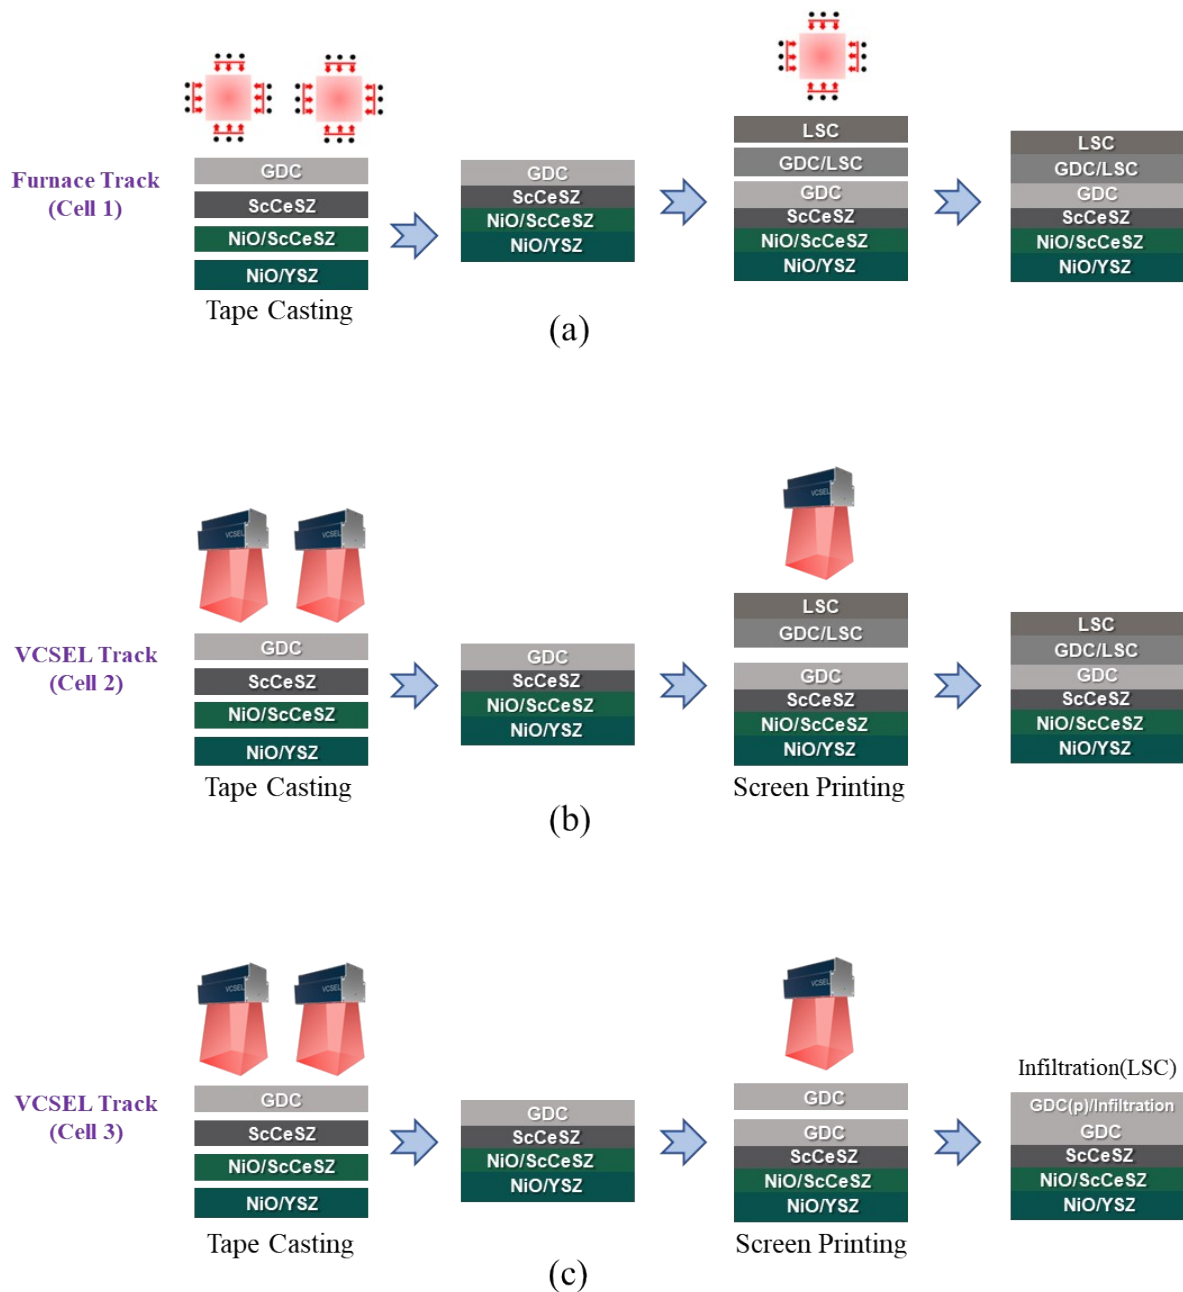

**Supplementary Figure S4.** Conventional thermal furnace processing and VCSEL-based photonic sintering (PS) processing applied to the fabrication of SOFCs. (a) Cell-1 fabricated through conventional thermal sintering only (with GDC/LSC cathodes and LSC current collectors), (b) Cell-2 fabricated through VCSEL-based photonic sintering (with GDC/LSC cathodes and LSC current collectors), and (c) Cell-3 fabricated through VCSEL-based photonic sintering (with a GDC scaffold infiltrated with LSC)

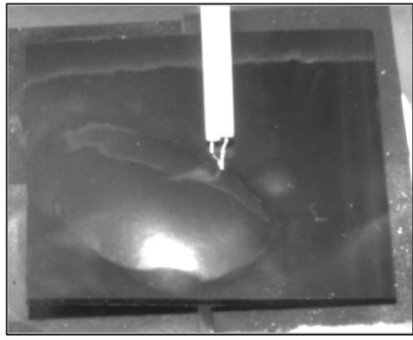

(a)

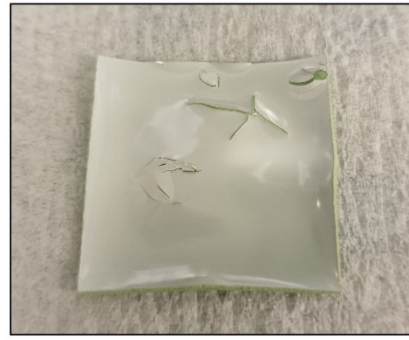

(b)

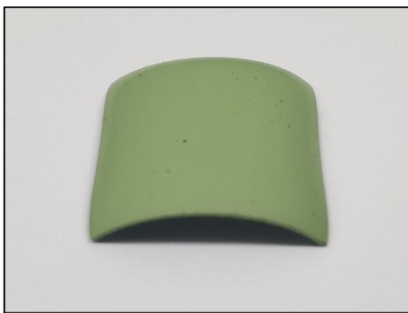

(c)

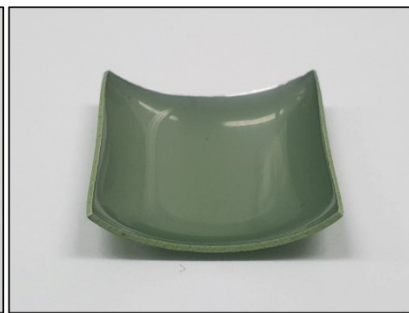

(d)

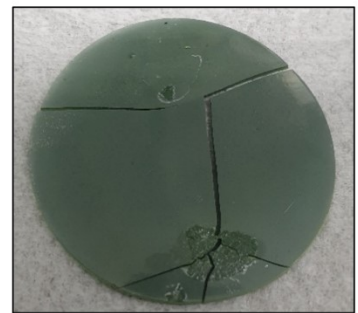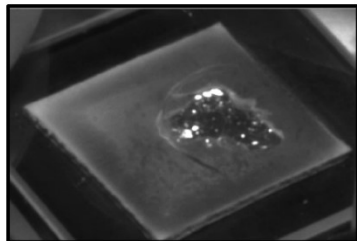

(e)

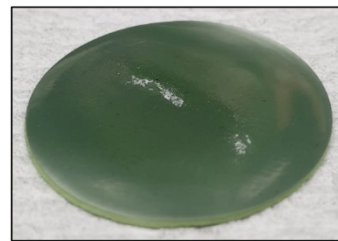

(f)

**Supplementary Figure S5.** Examples of processing defects found in VCSEL-based heat treatments. (a) Bubbling, (b) cracks originating from the unoptimized binder burnout process stage, (c) significant warpage, (d) cracks, (e) undesired phase formation, and (f) powder residue induced by the sintering (or densification) and flattening process stages.

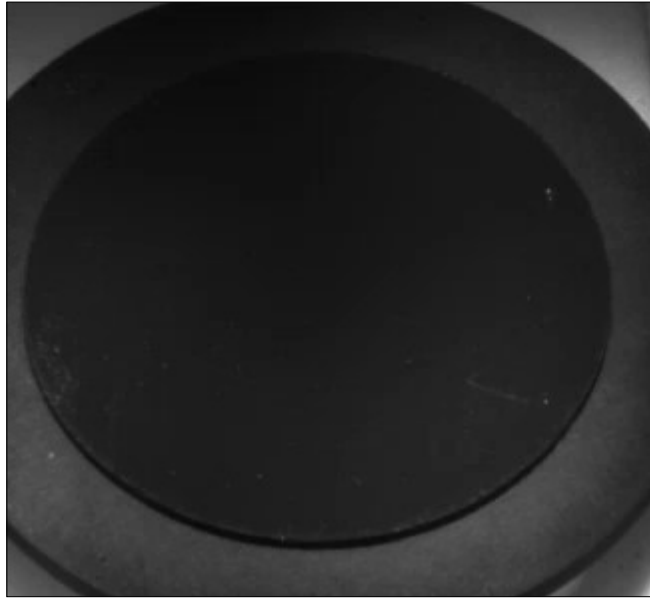

(a)

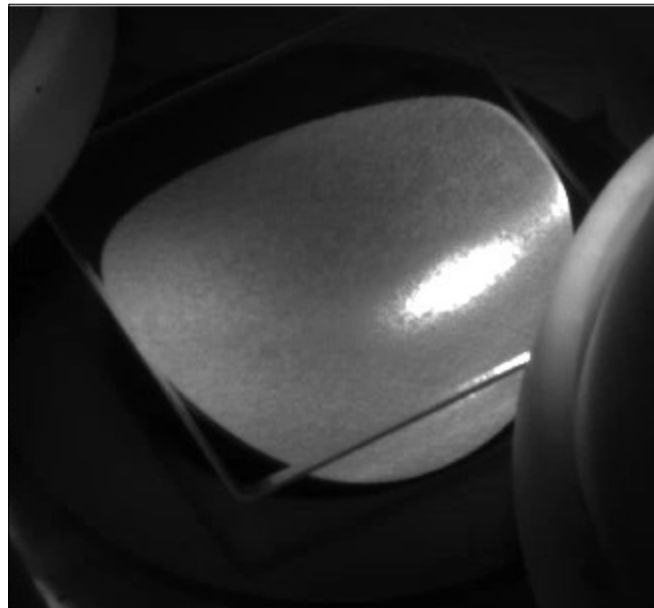

(b)

**Supplementary Figure S6.** Video clips obtained during the VCSEL-based sintering process of tape-cast composite materials composed of NiO-YSZ (ASL:  $\sim 675 \mu\text{m}$ )/NiO-ScCeSZ (AFL:  $12 \mu\text{m}$ )/ScCeSZ (electrolyte:  $7 \mu\text{m}$ )/GDC (BL:  $2 \mu\text{m}$ ): (a) binder burnout and 1<sup>st</sup> sintering and (b) 2<sup>nd</sup> sintering with the flattening process.

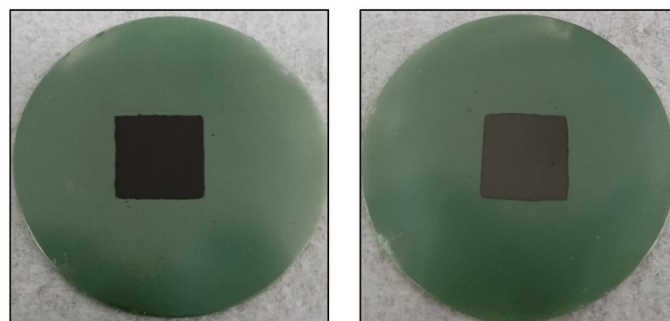

(a)

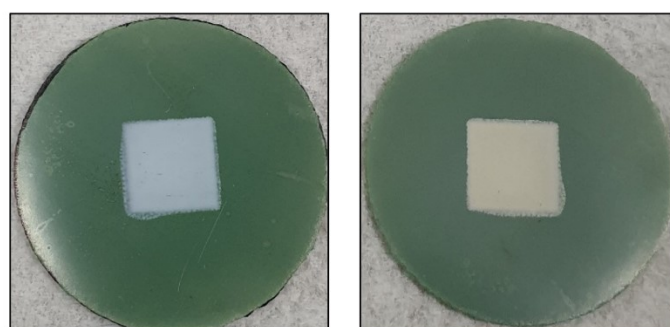

(b)

**Supplementary Figure S7.** (a) Sample images before and after VCSEL-based photonic processing applied to the SOFC cathode formation stage (photonic sintering process applied to Cell-2 and Cell-3): (a) formation of GDC/LCS composites and LSC current collectors and (b) formation of GDC scaffolds followed by LSC infiltration.



**Supplementary Table S1.** Detailed heat treatment information employed in conventional sintering (Fig. 2c) targeted at fabrication of high-performance solid oxide fuel cells. The summarized information includes step serial number, step process name, step start temperature and step end temperature, step process duration time, and total elapsed time (cumulative).

| Step Serial Number | Step Process Name                         | Start Temperature [°C] | End Temperature [°C] | Time [hr] | Total Elapsed Time (Cumulative) [hr] |
|--------------------|-------------------------------------------|------------------------|----------------------|-----------|--------------------------------------|
| 1                  | Pre-Heating for Binder Removal            | 0                      | 350                  | 20        | 20                                   |
| 2                  | Binder Removal                            | 350                    | 350                  | 5         | 25                                   |
| 3                  | Pre-Heating for Carbon Removal            | 350                    | 600                  | 10        | 35                                   |
| 4                  | Carbon Removal                            | 600                    | 600                  | 4         | 39                                   |
| 5                  | Pre-heating To 1 <sup>st</sup> Sintering  | 600                    | 1330                 | 9         | 48                                   |
| 6                  | 1 <sup>st</sup> Sintering                 | 1330                   | 1330                 | 3         | 51                                   |
| 7                  | Cooling after 1 <sup>st</sup> sintering   | 1330                   | 0                    | 9         | 60                                   |
| 8*                 | Pre-heating for 2 <sup>nd</sup> Sintering | 0                      | 1400                 | 14        | 74                                   |
| 9*                 | 2 <sup>nd</sup> Sintering                 | 1400                   | 1400                 | 3         | 77                                   |
| 10*                | Cooling after 2 <sup>nd</sup> sintering   | 1400                   | 0                    | 10        | 87                                   |
| 11*                | Pre-Heating for Cathode Formation         | 0                      | 950                  | 9.5       | 96.5                                 |
| 12                 | Cathode Formation                         | 950                    | 950                  | 3         | 99.5                                 |
| 13                 | Cooling After Cathode Formation           | 950                    | 0                    | 9.5       | 109                                  |

\*Flattening Process Incorporated

**Supplementary Table S2.** Detailed heat treatment information employed in VCSEL-based photonic sintering (Fig. 2d) targeted at fabrication of high-performance solid oxide fuel cells. The summarized information includes step serial number, step process name, step start temperature and step end temperature, step process duration time, and total elapsed time (cumulative).

| Step Serial Number | Step Process Name                                                | Start Temperature [°C] | End Temperature [°C] | Time [sec] | Total Elapsed Time (Cumulative) [sec] |
|--------------------|------------------------------------------------------------------|------------------------|----------------------|------------|---------------------------------------|
| 1                  | Pre-Heating for Binder Removal                                   | 50                     | 350                  | 3000       | 3000                                  |
| 2                  | Binder Removal                                                   | 350                    | 350                  | 300        | 3300                                  |
| 3                  | Pre-Heating for Carbon Removal                                   | 350                    | 600                  | 250        | 3550                                  |
| 4                  | Carbon Removal                                                   | 600                    | 600                  | 120        | 3670                                  |
| 5                  | Pre-heating To 1 <sup>st</sup> Sintering                         | 600                    | 1300                 | 700        | 4370                                  |
| 6                  | 1 <sup>st</sup> Sintering                                        | 1300                   | 1300                 | 180        | 4550                                  |
| 7                  | Cooling after 1 <sup>st</sup> sintering                          | 1300                   | 50                   | 250        | 4800                                  |
| 8*                 | Pre-heating for 2 <sup>nd</sup> Sintering                        | 50                     | 1100                 | 525        | 5325                                  |
| 9*                 | Pre-heating for 2 <sup>nd</sup> Sintering                        | 1100                   | 1200                 | 100        | 5425                                  |
| 10*                | Pre-heating for 2 <sup>nd</sup> Sintering                        | 1200                   | 1320                 | 240        | 5665                                  |
| 11*                | 2 <sup>nd</sup> Sintering                                        | 1320                   | 1320                 | 300        | 5965                                  |
| 12*                | Cooling after 2 <sup>nd</sup> sintering                          | 1320                   | 50                   | 1270       | 7235                                  |
| 13                 | 2 <sup>nd</sup> Pre-Heating for Cathode Formation (GDC Scaffold) | 50                     | 1050                 | 500        | 7735                                  |
| 14                 | 2 <sup>nd</sup> Pre-Heating for Cathode Formation (GDC Scaffold) | 1050                   | 1250                 | 200        | 7935                                  |
| 15                 | Cathode Formation (GDC Scaffold)                                 | 1250                   | 1250                 | 180        | 8115                                  |
| 16                 | Cooling After Cathode Formation (GDC Scaffold)                   | 1250                   | 50                   | 600        | 8715                                  |

\*Flattening Process Incorporated
